# Supplementary material
Source: HighWire-hosted journal article supplement (https://diabetes.diabetesjournals.org/content/suppl/2007/02/09/db06-0367)
Supplement: DB06-0367.R2_Table_1.pdf [file DB06-0367.R2_Table_1.pdf]

Table 1. Insulin Vesicle Secretion Kinetics in Primary Cultures of Pancreatic Beta Cells

| Stimulus Type | Lag (s)                 | Pulse Mass (ves/ $\mu\text{m}^2$ ) | Pulse Duration (s) | Pulse Interval (s) | Secretion Rate (Overall <sup>†</sup> , Burst <sup>‡</sup> , Maximum <sup>§</sup> ) (ves/min/ $\mu\text{m}^2$ ) | Number of Pulses | Vesicles Secreted in Bursts (%) | Arrival Rate (ves/hr/ $\mu\text{m}^2$ ) | Membrane Surface Area ( $\mu\text{m}^2$ ) | Fluorescent Vesicle Density (ves/ $\mu\text{m}^2$ ) |
|---------------|-------------------------|------------------------------------|--------------------|--------------------|----------------------------------------------------------------------------------------------------------------|------------------|---------------------------------|-----------------------------------------|-------------------------------------------|-----------------------------------------------------|
| <i>Rat</i>    |                         |                                    |                    |                    |                                                                                                                |                  |                                 |                                         |                                           |                                                     |
| $K^+$ (n=5)   | 2.0±0.6 <sup>*,  </sup> | 0.09±0.03                          | 5.2±1.4            | NA                 | 0.10±0.02 <sup>††</sup><br>1.29±0.35 <sup>*,#</sup><br>4.69±1.32                                               | NA               | NA                              | 0.13±0.03 (n=3)                         | 1200±50                                   | 0.70±0.10                                           |
| Glucose (n=8) | 54±30                   | 0.02±0.01                          | 10.2±2.7           | 46 <sup>‡‡</sup>   | 0.02±0.01<br>0.25±0.09<br>3.13±1.73                                                                            | 5.5±0.9          | 79±4                            | 0.07±0.02 (n=8)                         | 1500±300                                  |                                                     |
| <i>Human</i>  |                         |                                    |                    |                    |                                                                                                                |                  |                                 |                                         |                                           |                                                     |
| $K^+$ (n=5)   | 1.7±0.5 <sup>*,¶</sup>  | 0.18±0.03                          | 14.8±3.5           | NA                 | 0.22±0.04 <sup>††</sup><br>1.00±0.35<br>4.75±0.65                                                              | NA               | NA                              | 0.74±0.11 (n=13)                        | 1100±150                                  | 0.70±0.09                                           |
| Glucose (n=5) | 63±19                   | 0.08±0.04                          | 18.4±7.8           | 50 <sup>‡‡</sup>   | 0.05±0.02<br>0.26±0.08<br>3.79±0.67                                                                            | 6.8±1.3          | 80±6                            | 0.43±0.18 <sup>*,**</sup> (n=5)         | 900±210                                   |                                                     |

<sup>†</sup>Overall Secretion Rate=(Total Vesicles Secreted)/(Total Imaging Time)

<sup>‡</sup>Burst Secretion Rate=(Vesicles Secreted in Pulse)/(Pulse Duration)

<sup>§</sup>Maximum Secretion Rate=Maximum(Vesicles Secreted in Single Frame)/(Frame Duration)

For cells stimulated with glucose, the data are compiled from the first ten minutes of stimulation.

\* p<0.05, Student's two-sided t-test

|| Compared to "Lag" for glucose-stimulated rat cells

¶ Compared to "Lag" for glucose-stimulated human cells

# Compared to "Burst Secretion Rate" for glucose-stimulated rat cells

\*\* Compared to "Arrival Rate" for glucose-stimulated rat cells

NA—Not Applicable

<sup>††</sup> Calculated using the first minute of secretion following stimulation.

<sup>‡‡</sup> Median value for the distribution of all pulse intervals in all cells. Pulses were identified by a sudden change in the slope of the cumulative secretion plot. See figure legends for statistically significant pulse intervals identified in specific cells.
