# Supplementary material
Source: HighWire-hosted journal article supplement (https://diabetes.diabetesjournals.org/content/suppl/2007/02/09/db06-0367)

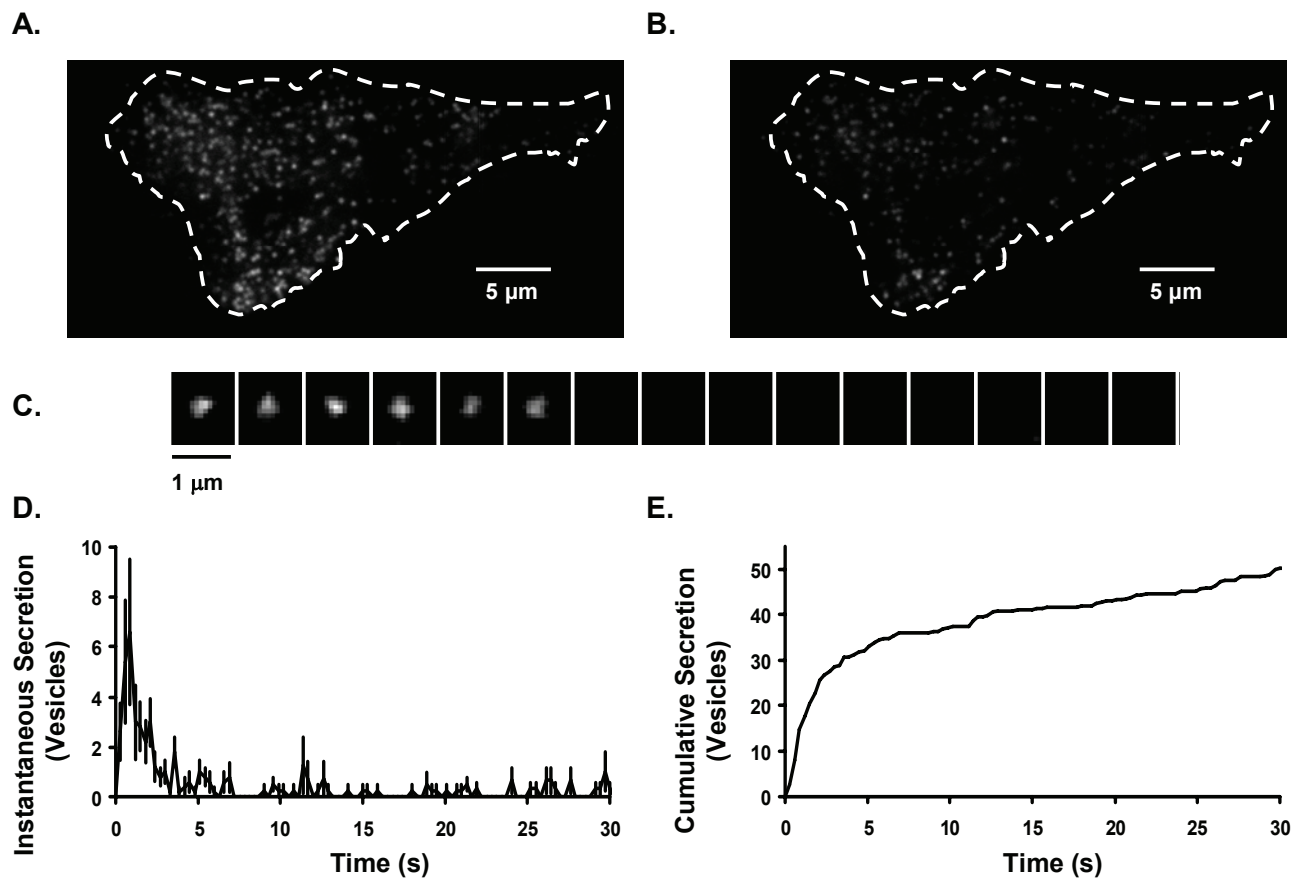

Michael et al., Figure 1

Supplement: DB06-0367.R2_Fig._1.pdf [file DB06-0367.R2_Fig._1.pdf]

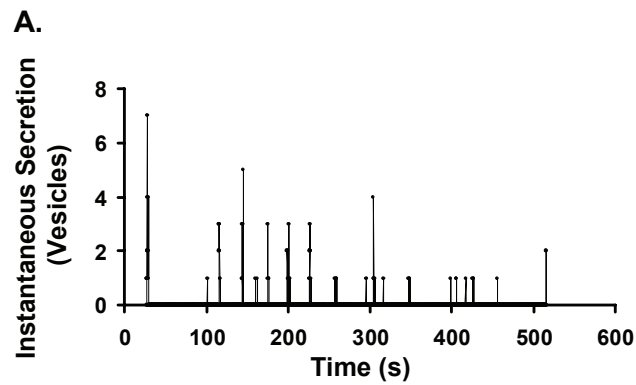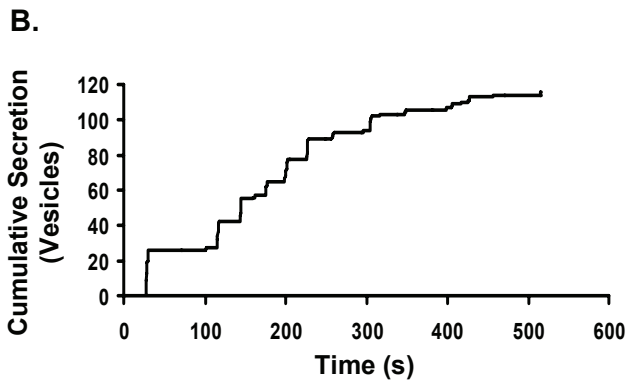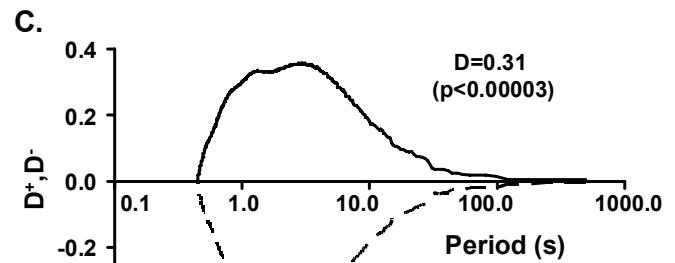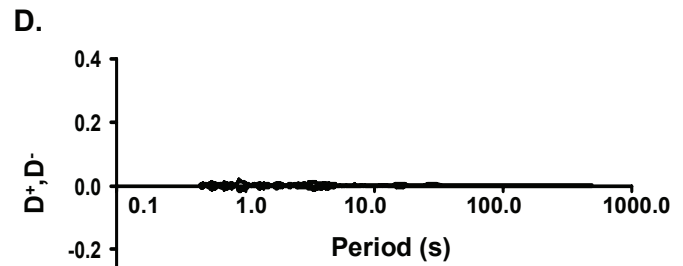

Michael et al., Figure 2

Supplement: DB06-0367.R2_Fig._2.pdf [file DB06-0367.R2_Fig._2.pdf]

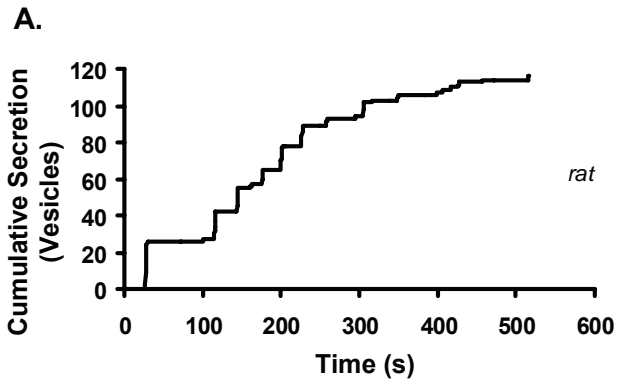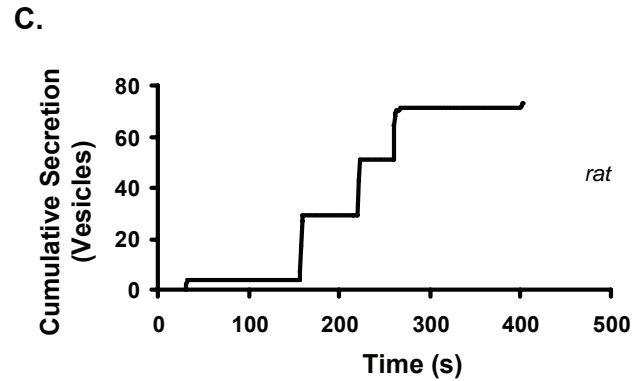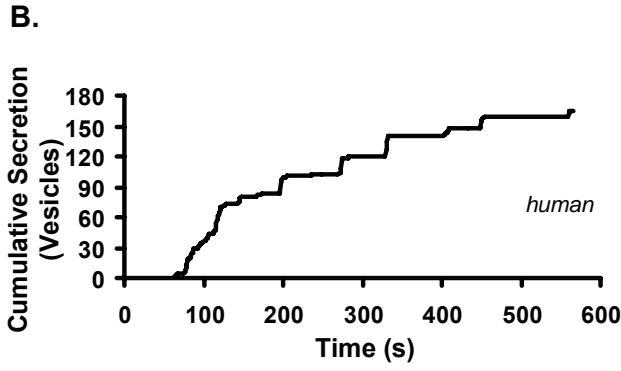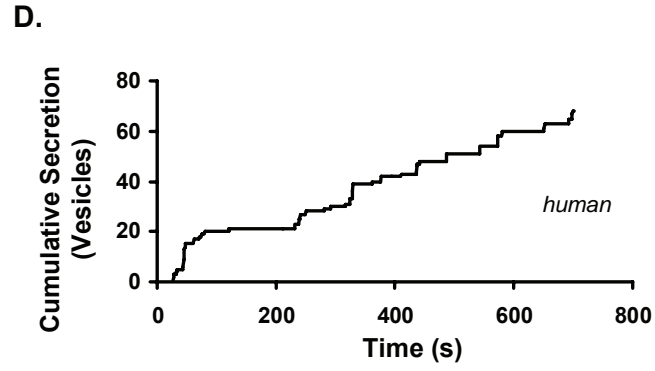

Michael et al., Figure 3

Supplement: DB06-0367.R2_Fig._3.pdf [file DB06-0367.R2_Fig._3.pdf]

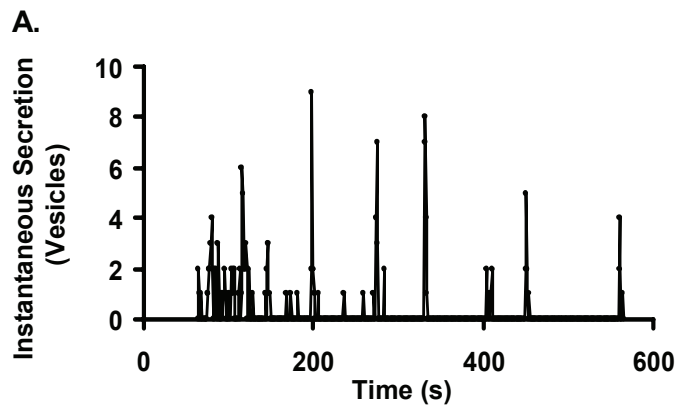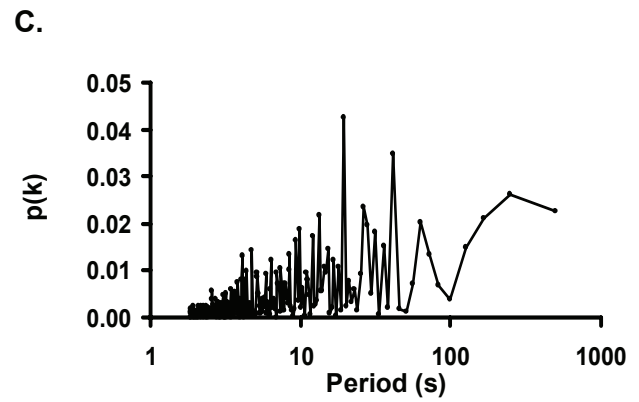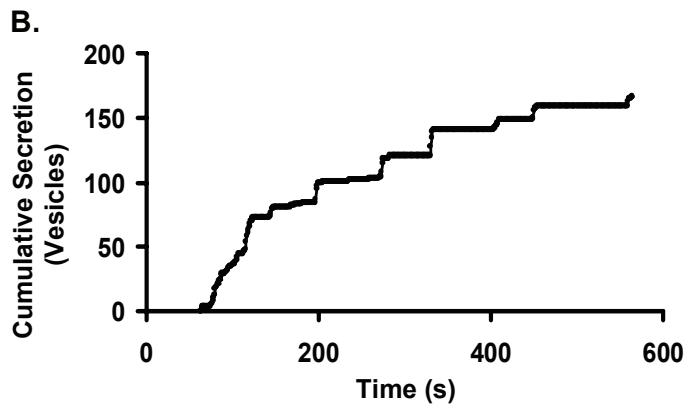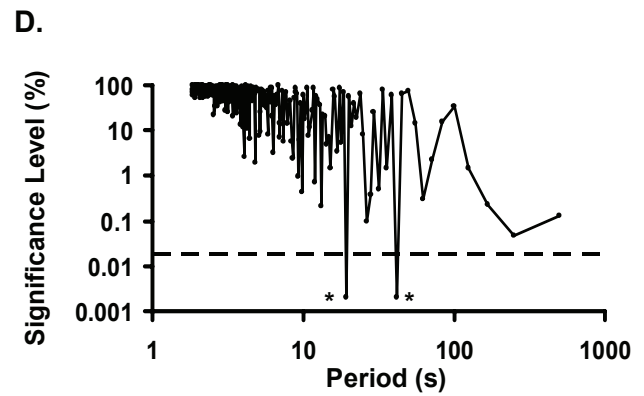

Michael et al., Figure 5

Supplement: DB06-0367.R2_Fig._5.pdf [file DB06-0367.R2_Fig._5.pdf]

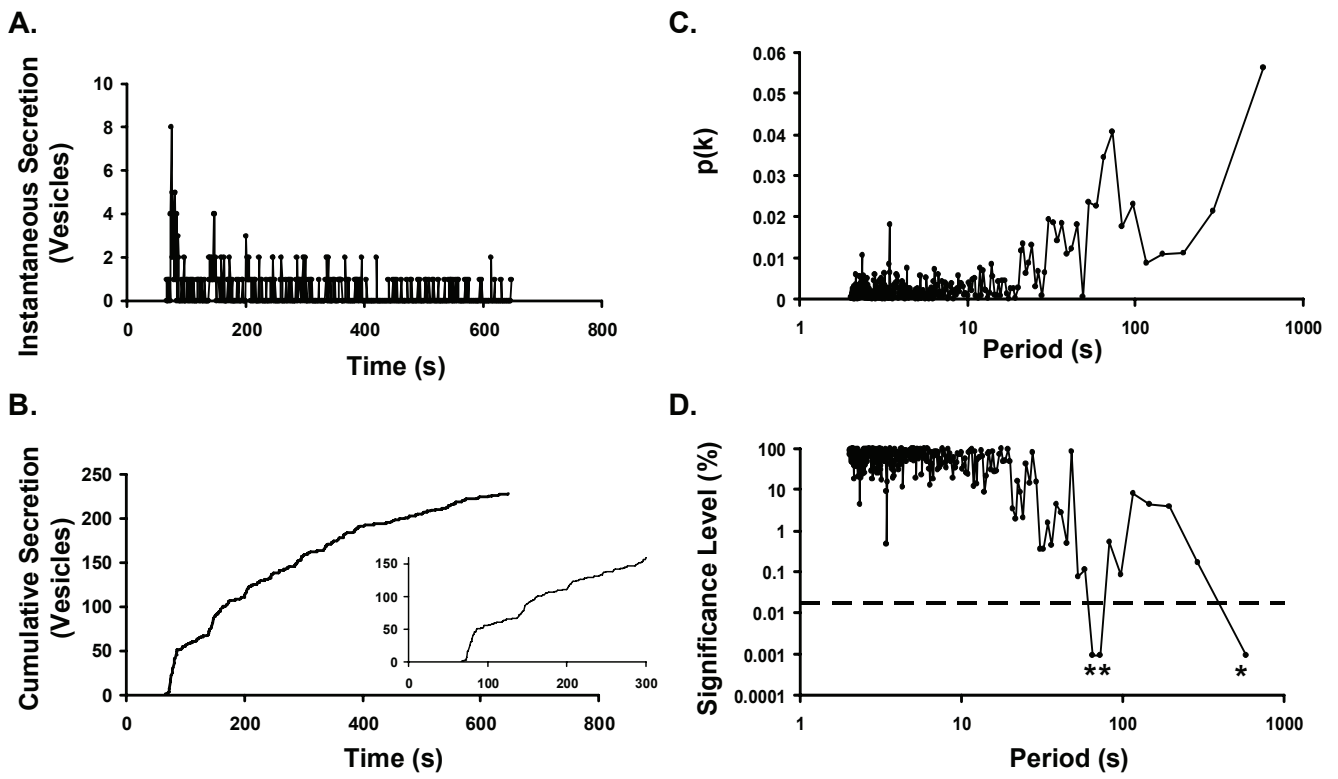

Michael et al., Figure 6

Supplement: DB06-0367.R2_Fig._6.pdf [file DB06-0367.R2_Fig._6.pdf]

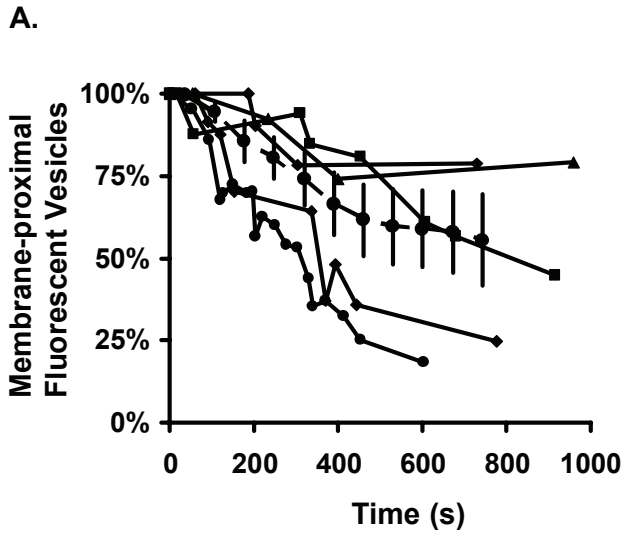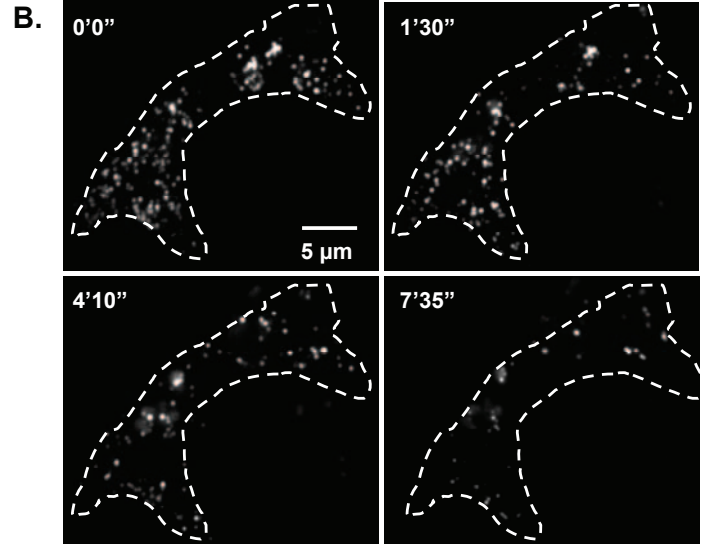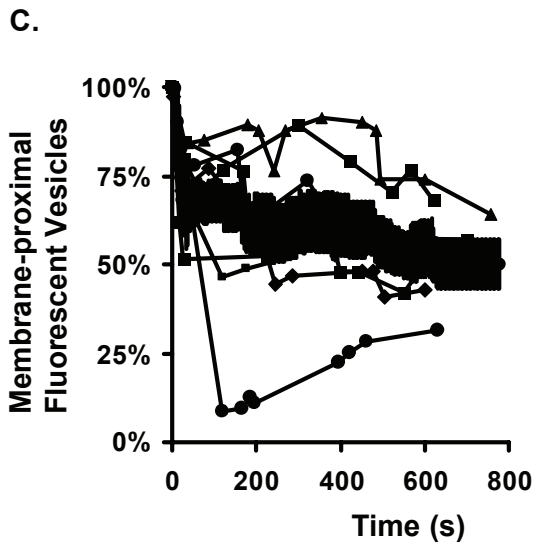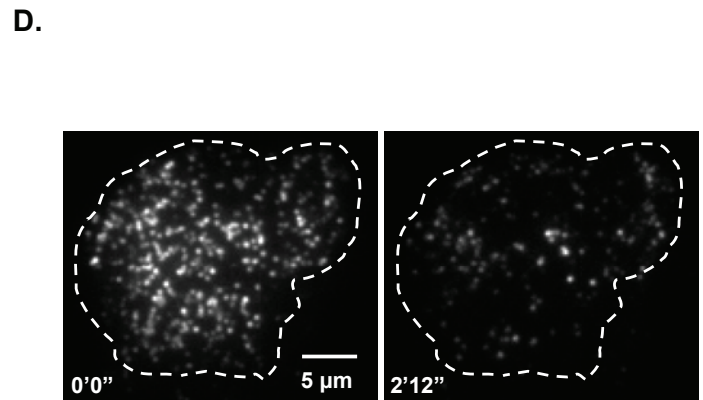

Supplement: DB06-0367.R2_Fig._7.pdf [file DB06-0367.R2_Fig._7.pdf]

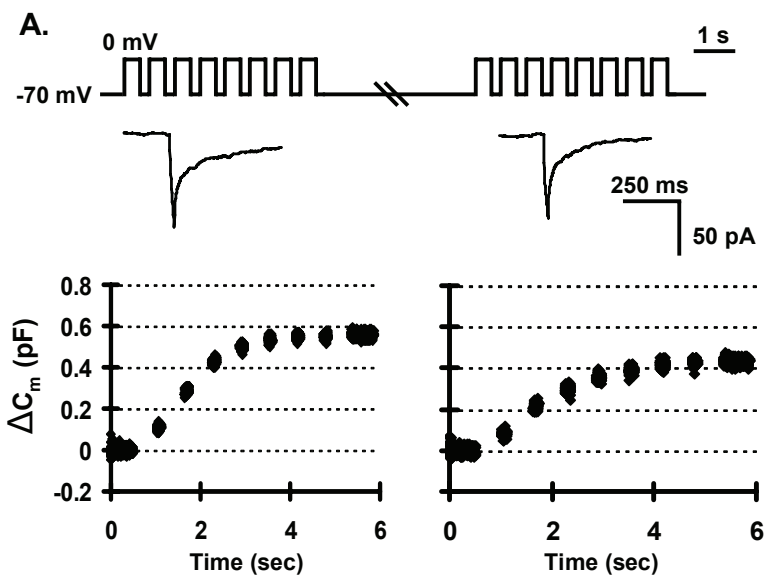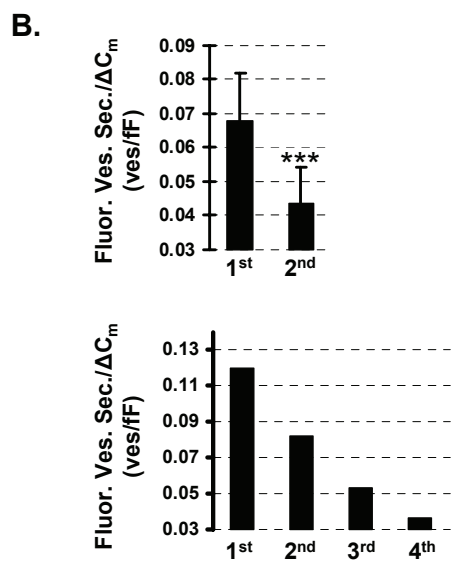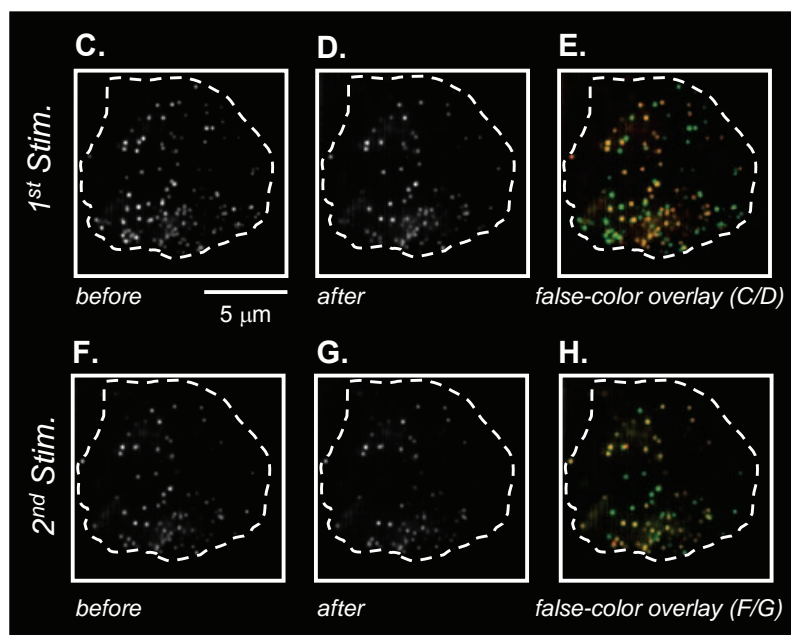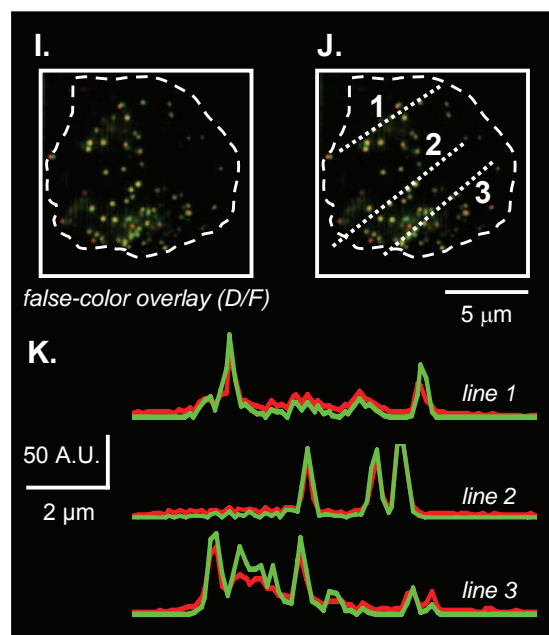

Supplement: DB06-0367.R2_Fig._8.pdf [file DB06-0367.R2_Fig._8.pdf]
